# Supplementary material for: Organoboron copolymers containing thienothiophene and selenophenothiophene analogues: optical, electrochemical and fluoride sensing properties
Source: Royal Society of Chemistry journal article supplement (doi:10.1039/c7ra01793f), 2017-01-01
Supplement: c7ra01793f1.pdf [file c7ra01793f1.pdf]

## *Supporting Information*

*For*

# **Organoboron copolymers containing thienothiophene and selenophenothiophene analogues: Optical, electrochemical and fluoride sensing properties**

**Gulsen Turkoglu,<sup>#</sup> M. Emin Cinar,<sup>#,§</sup> Turan Ozturk<sup>#,§,\*</sup>**

<sup>#</sup>Department of Chemistry, Faculty of Science, Istanbul Technical University, Maslak, Istanbul 34469, Turkey

<sup>§</sup>Department Chemie-Biologie, OC1, Universität Siegen, Adolf-Reichwein-Str., D-57068 Siegen, Germany

<sup>§</sup>TUBITAK-UME, Chemistry Group Laboratories, PO Box 54, 41471, Gebze, Kocaeli, Turkey

| <b>Content</b>                               | <b>Page</b> |
|----------------------------------------------|-------------|
| NMR Spectra                                  | S1–S3       |
| TGA thermograms of polymers                  | S4          |
| Absorption and Emission Spectra in Thin Film | S4          |
| Absorption and Emission Titration Spectra    | S5          |
| Computation                                  | S6          |
| -Molecular Orbitals                          | S6          |
| -Absorption and Emission Spectra             | S7          |
| -Cartesian Coordinates                       | S8–S10      |

## NMR and Mass Spectra

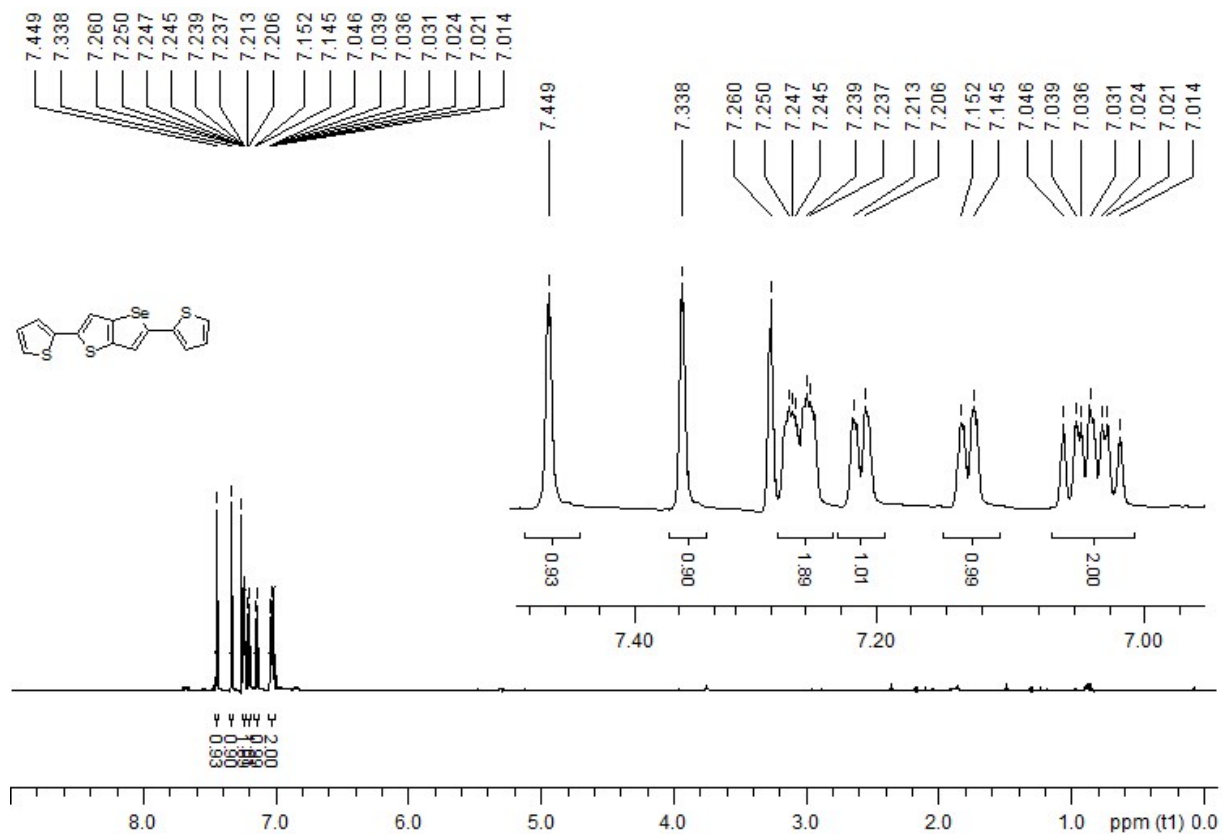

**Figure S1.** <sup>1</sup>H-NMR (500 MHz, CDCl<sub>3</sub>) spectrum of **5**.

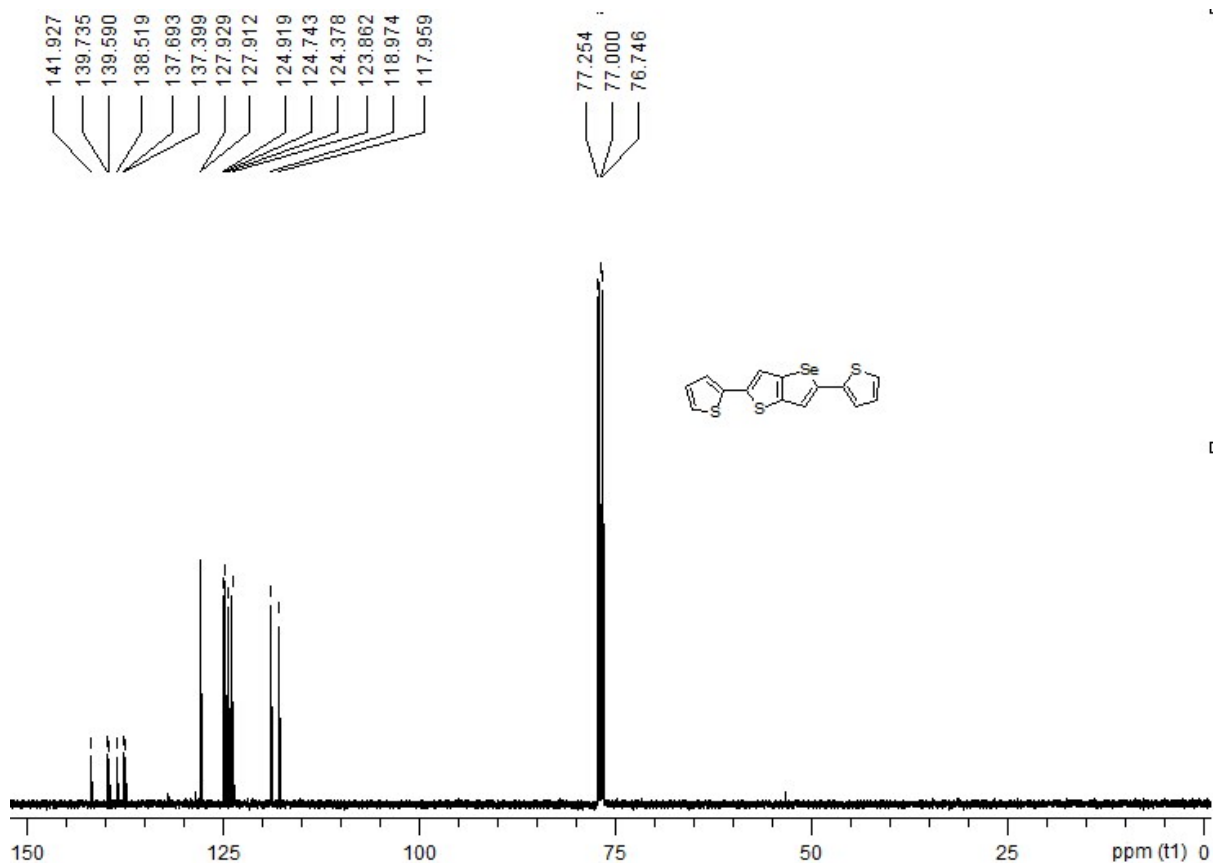

**Figure S2.** <sup>13</sup>C-NMR (125 MHz, CDCl<sub>3</sub>) spectrum of **5**.

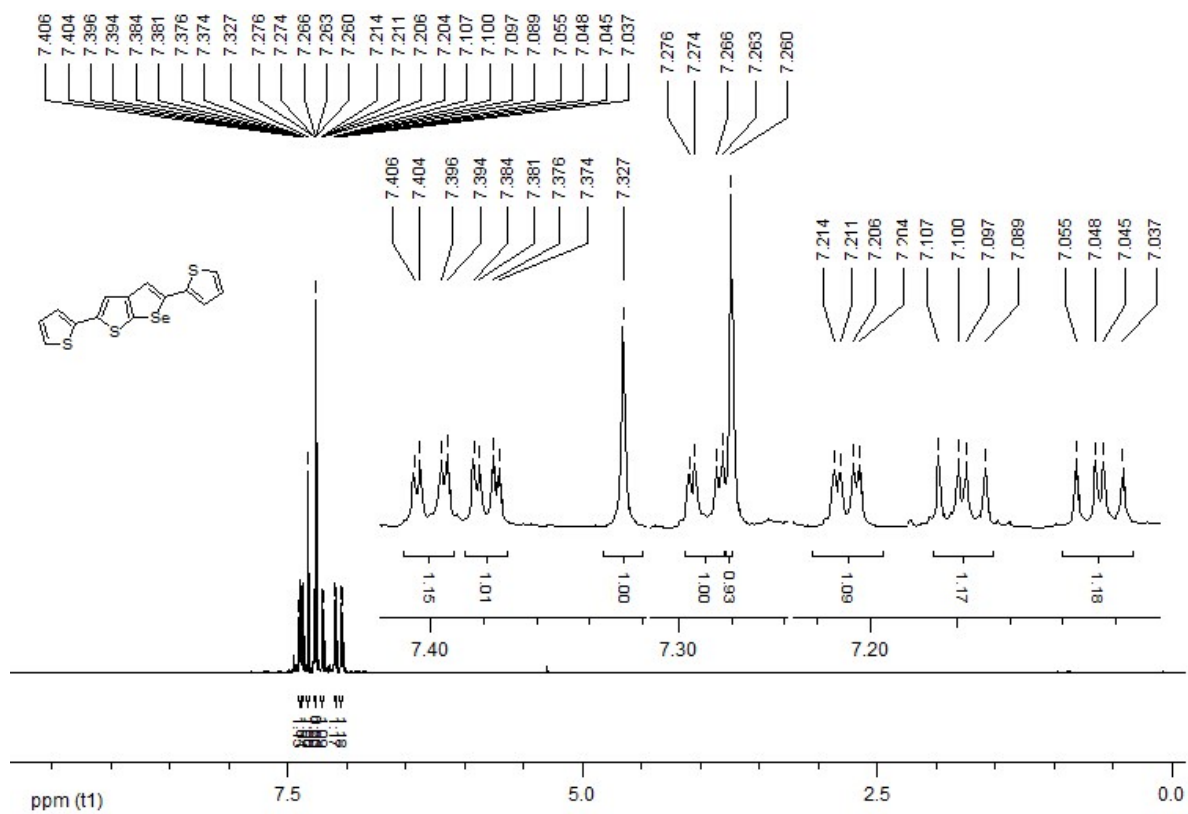

Figure S3. <sup>1</sup>H-NMR (500 MHz, CDCl<sub>3</sub>) spectrum of 6.

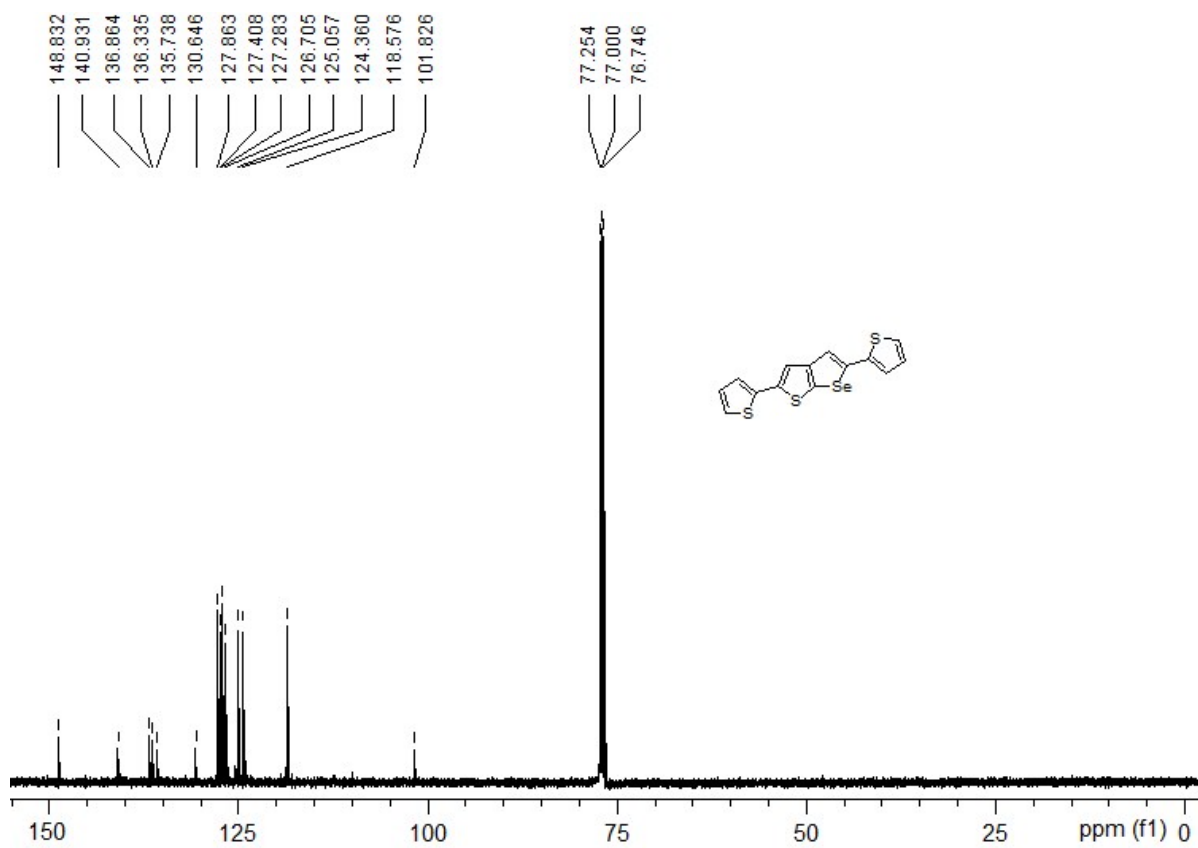

Figure S4. <sup>13</sup>C-NMR (125 MHz, CDCl<sub>3</sub>) spectrum of 6.

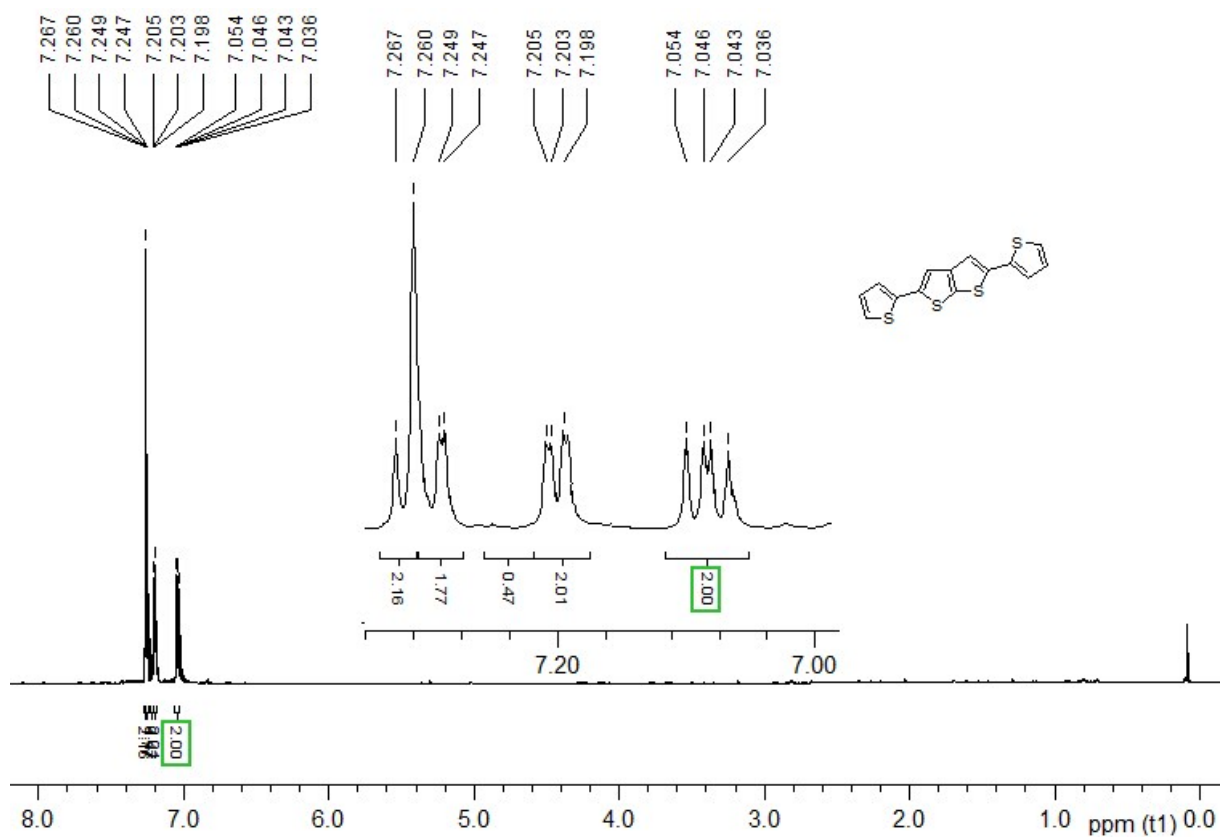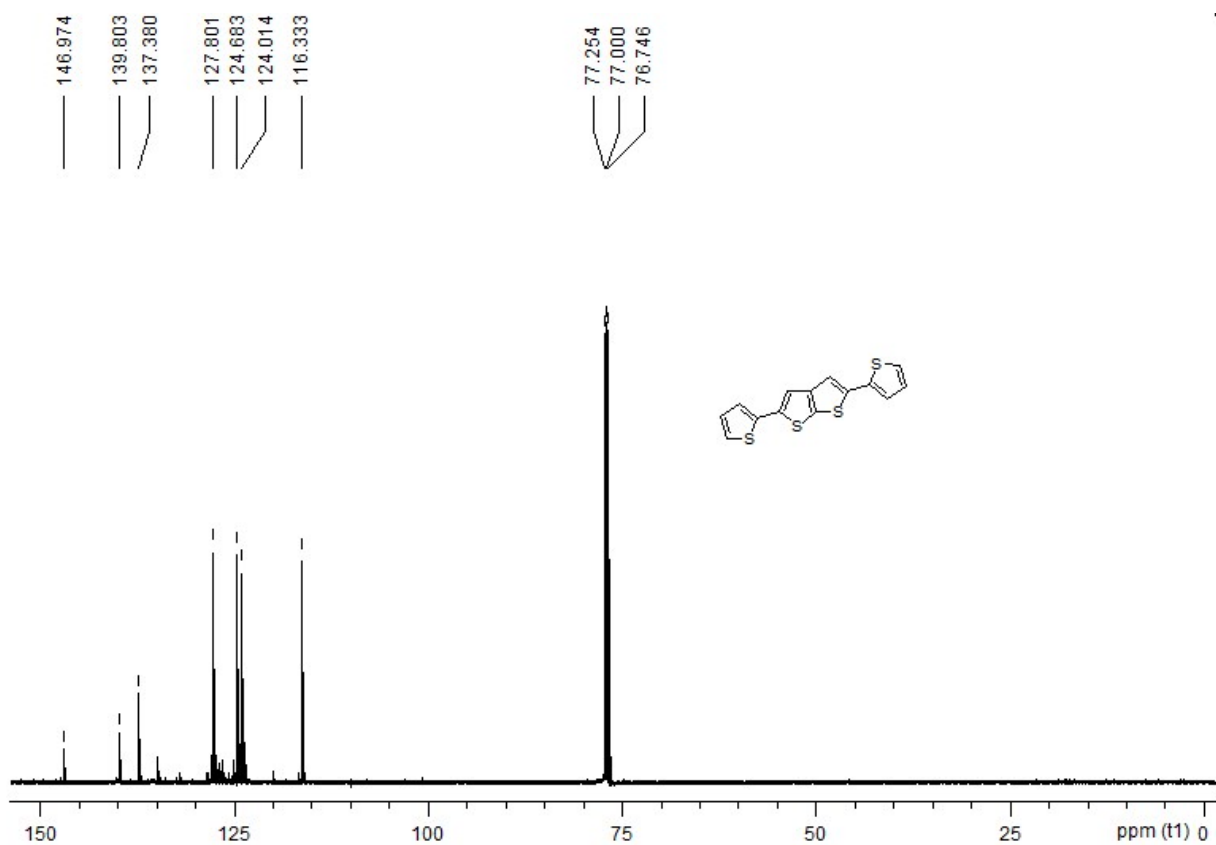

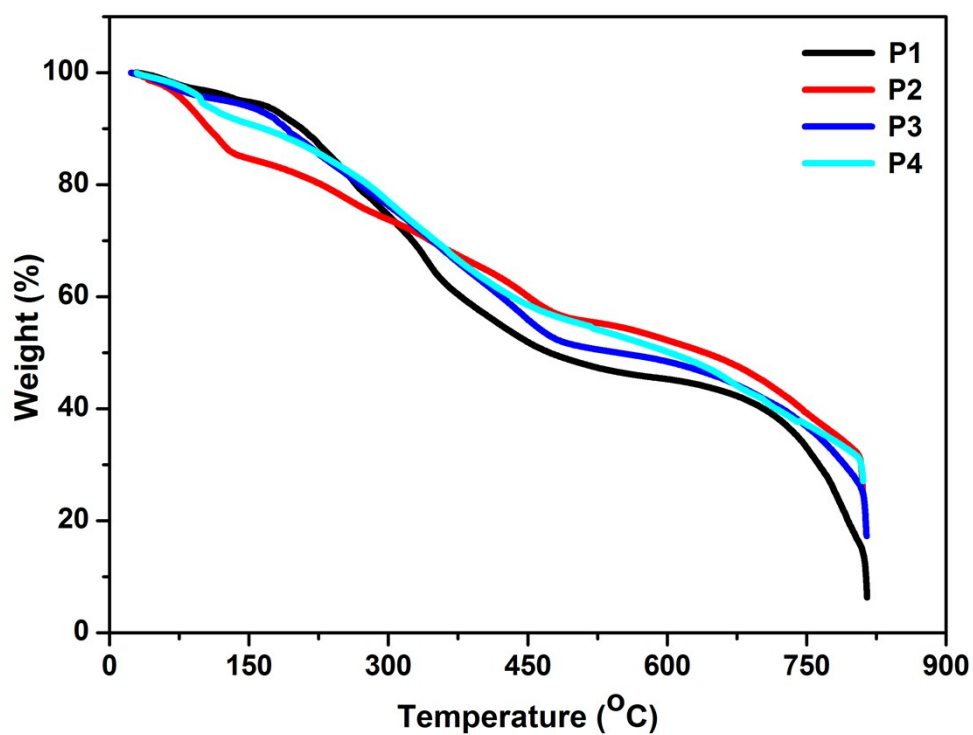

**Figure S7.** TGA thermograms of polymers **P1-P4**. TGA, thermogravimetric analysis.

### Absorption and Emission Spectra in Thin Film

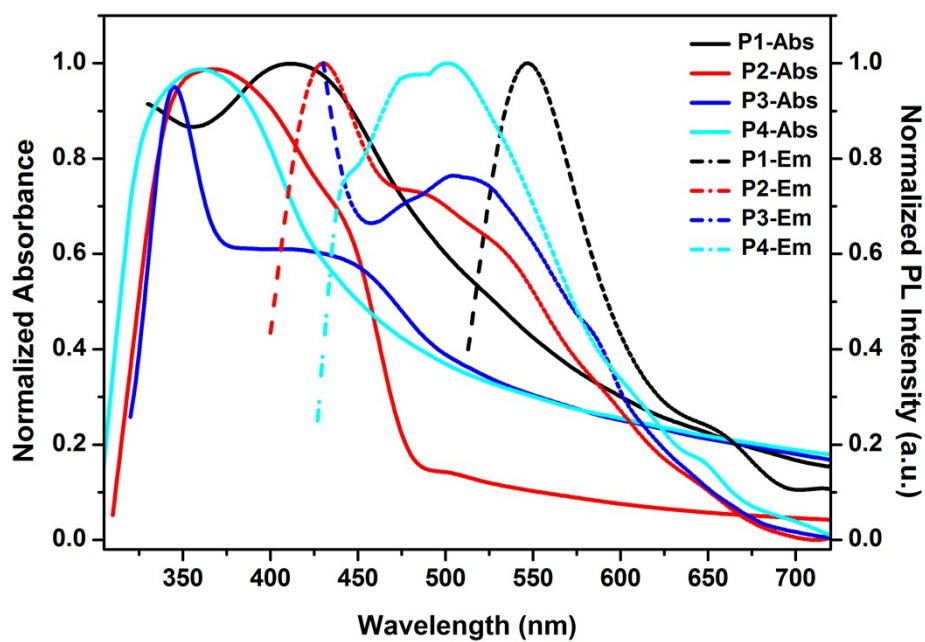

**Figure S8.** Absorption and emission spectra of **P1-P4** in spin-coated film.

## Absorption and Emission Titration Spectra

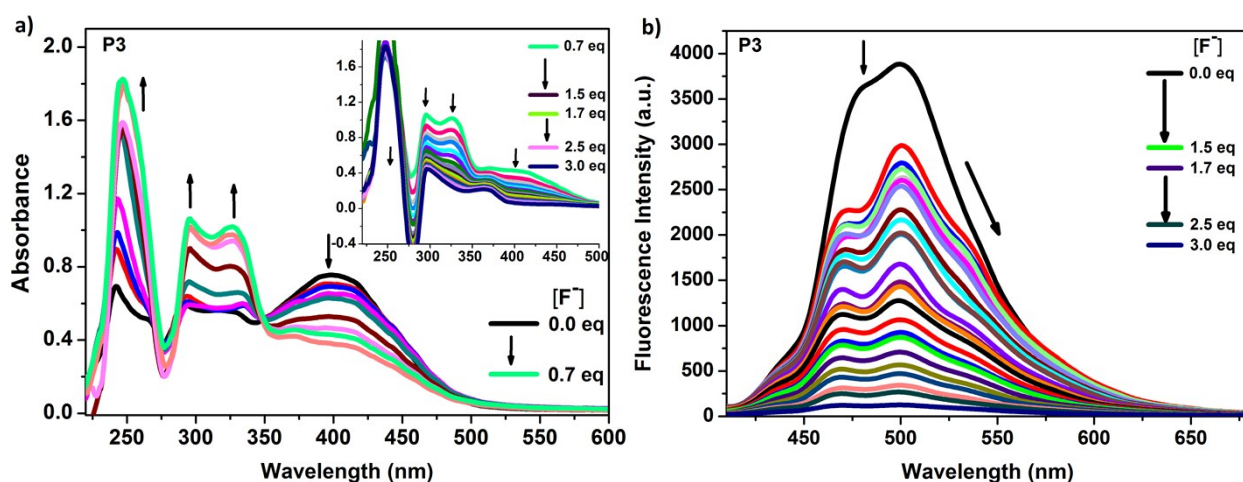

**Figure S9.** a) Absorption spectra and b) emission spectra ( $\lambda_{\text{exc}}=400$  nm) of **P3** ( $1 \times 10^{-5}$  M based on boron sites) in THF in the presence of various amounts of TBAF.

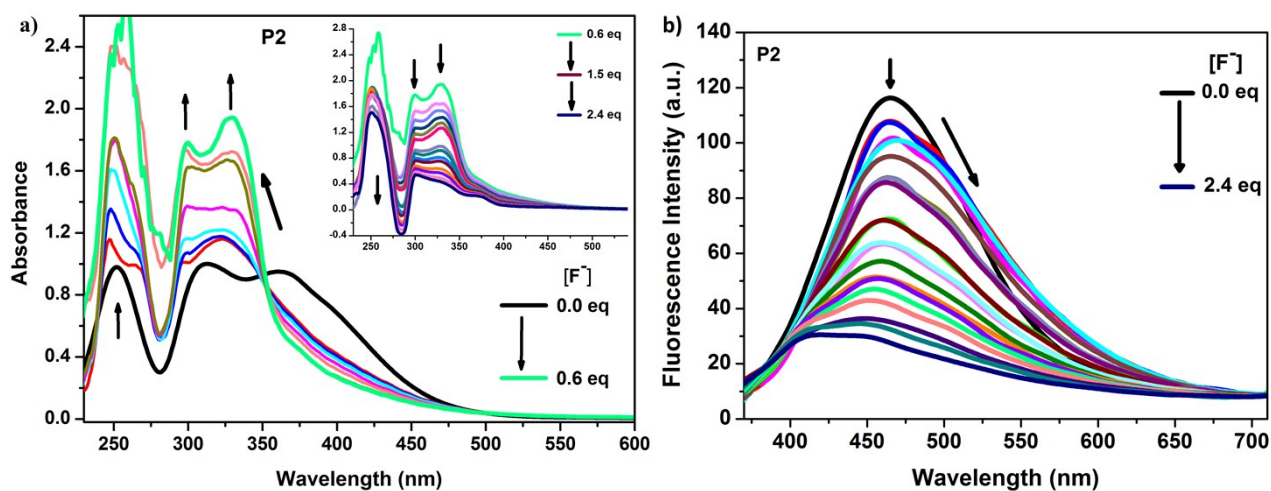

**Figure S10.** a) Absorption spectra and b) emission spectra ( $\lambda_{\text{exc}}=370$  nm) of **P2** ( $1 \times 10^{-5}$  M based on boron sites) in THF in the presence of various amounts of TBAF.

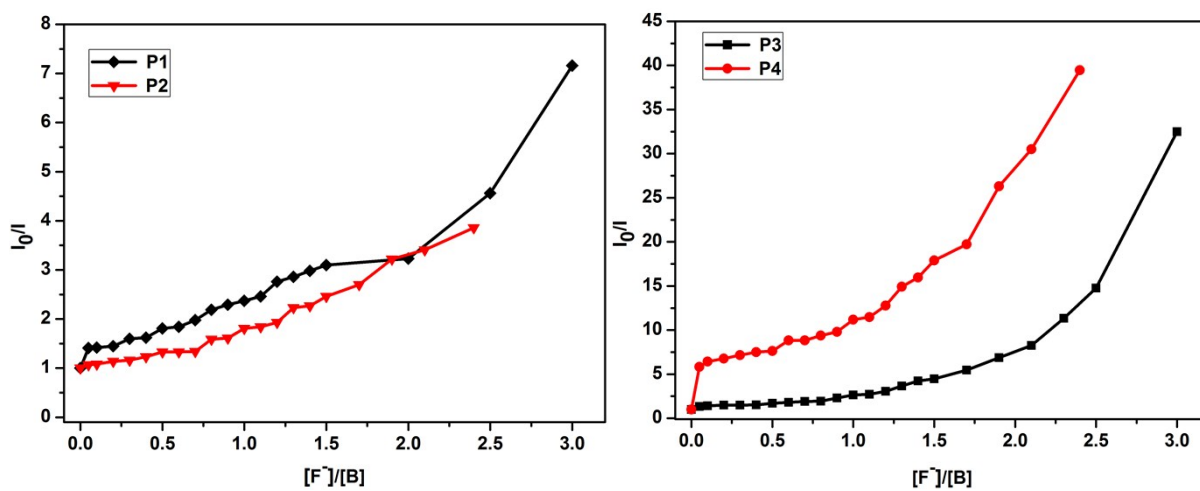

**Figure S11.** Stern-Volmer plots of the fluorescence intensity change ( $I_0/I$ ) as a function of  $[F^-]$  for polymers **P1-P4**.

## Computation

### Molecular Orbitals

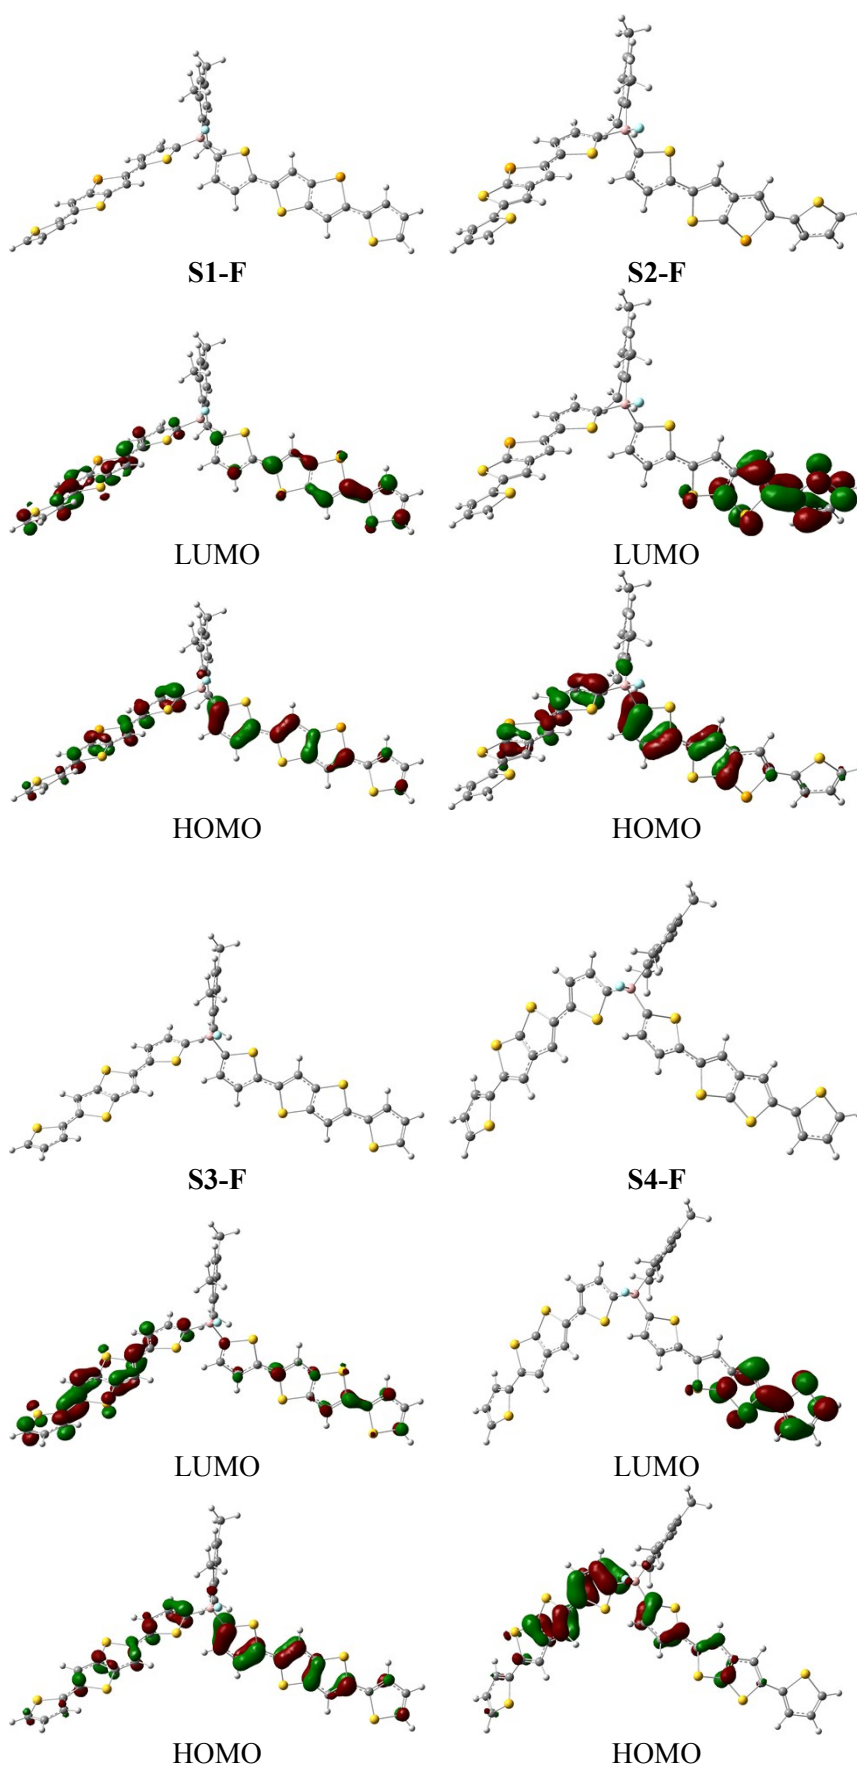

**Figure S12.** FMOs (isosurface value = 0.04 au) of segments **S1-F** – **S4-F** at (PCM:THF)-B3LYP/6-31G(d) level.

## Absorbance and Emission Spectra

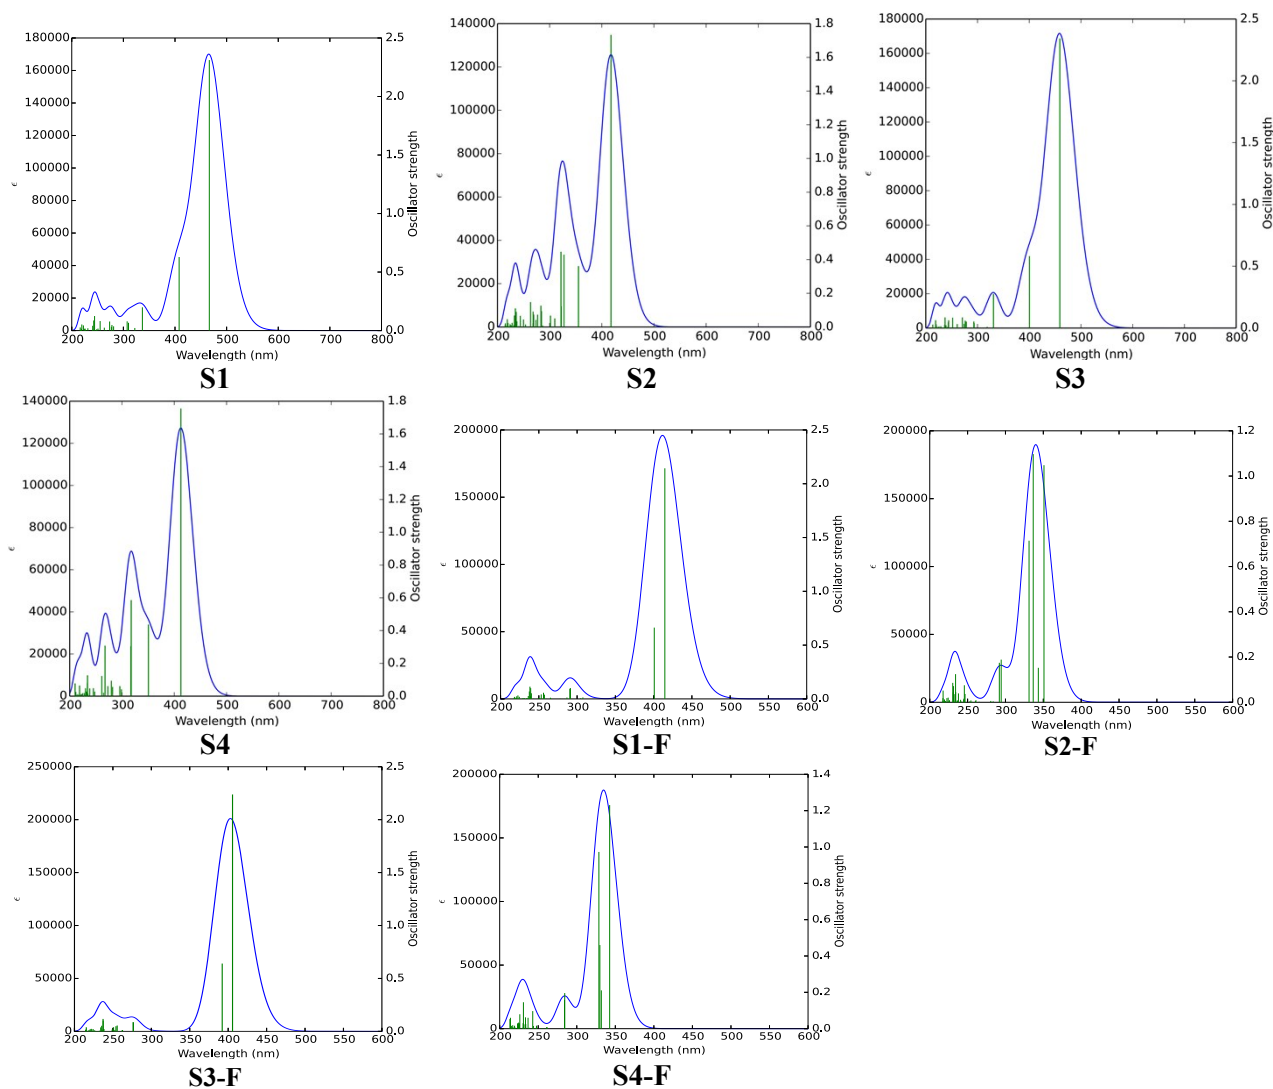

**Figure S13.** Absorption spectra predicted at the (CPCM:THF)-CAM-TD-B3LYP/6-311++G(d,p) level.

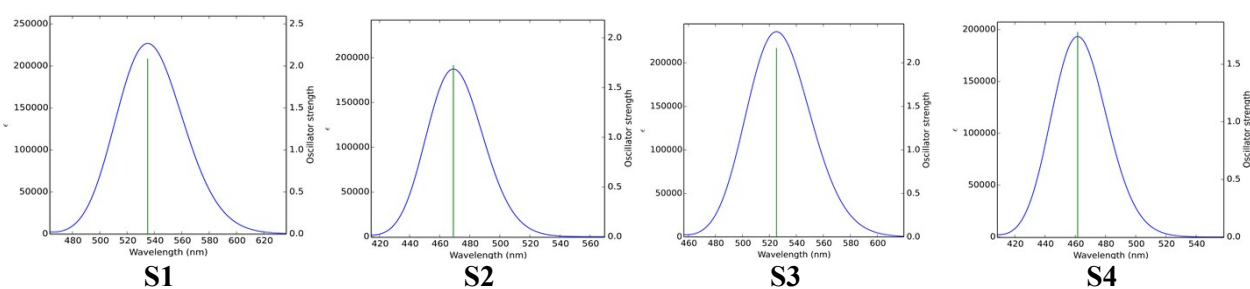

**Figure S14.** Emission spectra predicted at the (CPCM:THF)-CAM-TD-B3LYP/6-311++G(d,p) level.

**Table S1.** Computed ((CPCM:THF)-CAM-TD-B3LYP/6-311++G(d,p)) and experimental  $\lambda_{\text{emission}}$  values.

| Dimer | $\lambda_{\text{emission}}^{\text{calc.}}$ (nm) | $\lambda_{\text{emission}}^{\text{exp.}}$ (nm) |
|-------|-------------------------------------------------|------------------------------------------------|
| S1    | 535                                             | 542,572(s)                                     |
| S2    | 465                                             | 464                                            |
| S3    | 525                                             | 500                                            |
| S4    | 461                                             | 444                                            |



# Cartesian Coordinates

## M1

C 1.3338090 1.1456970 -0.0252430  
C -0.0344720 0.7693600 -0.0183080  
H 1.6694460 2.1775160 -0.0375230  
C -0.3127550 -0.5936840 -0.0247300  
S -1.5141560 1.6992600 -0.0160140  
C -1.6920170 -0.9092880 -0.0405340  
H -2.0921700 -1.9165280 -0.0653180  
C -2.4886100 0.2181290 -0.0416320  
C -3.9334630 0.3038800 -0.0532810  
C -4.7357090 1.3949670 -0.3178790  
S -4.9275960 -1.1012660 0.3105730  
C -6.1289450 1.1109300 -0.2390980  
H -4.3383320 2.3704840 -0.5779790  
C -6.3901170 -0.1924600 0.0836690  
H -6.9035910 1.8473370 -0.4226280  
H -7.3484490 -0.6796700 0.2033360  
C 2.2102030 0.0843840 -0.0313250  
C 3.6548880 0.1124490 -0.0381010  
C 4.5380050 -0.9225280 -0.2704310  
S 4.5428420 1.5990360 0.2805790  
C 5.9059630 -0.5344720 -0.2018490  
H 4.2121870 -1.9324170 -0.4985210  
H 6.7333310 -1.2167930 -0.3627970  
Se 1.2790210 -1.5836420 -0.0236990  
C 6.0690390 0.7938940 0.0816820  
H 6.9884800 1.3538830 0.1873530

## M2

C 1.1301080 1.0255910 -0.0214760  
C -0.1837380 0.4529610 0.0063770  
H 1.3012100 2.0975550 -0.0472500  
C -0.1936860 -0.9381570 0.0090260  
C 2.1627100 0.1262840 -0.0391420  
C 3.5882400 0.3769140 -0.0694270  
C 4.6081060 -0.4694290 -0.4503950  
S 4.2482860 1.9299420 0.4280480  
C 5.9029090 0.1169760 -0.3564650  
H 4.4308730 -1.4789370 -0.8076660  
H 6.8180800 -0.4005640 -0.6223180  
Se 1.5154730 -1.6777010 -0.0051030  
S -1.7908330 -1.6024700 0.0179190  
C -2.4893790 0.0336700 0.0436980  
H -1.5083140 0.9947320 0.0290030  
H -1.7239530 2.0576240 0.0523080  
C -3.9303620 0.1934840 0.0681350  
C -4.8989860 -0.7169100 0.4336240  
S -4.6776080 1.7075730 -0.4220030  
C -6.2261620 -0.2077080 0.3336490  
H -4.6664980 -1.7173680 0.7834570  
H -6.2687600 1.0867930 -0.1055330  
C -7.1105800 -0.7816610 0.5876510  
H -7.1328180 1.7180390 -0.2637700  
C 5.8711140 1.4078540 0.0947450  
H 6.6972720 2.0880940 0.2527310

## M3

C -1.5052020 1.0118240 -0.1562080  
S -1.3609900 -1.5801110 0.2003880  
C -0.1294900 0.6779340 -0.0903490  
H -1.8900680 2.0130960 -0.3123360  
C 0.1294910 -0.6779410 0.0902820  
S 1.3609800 1.5801130 -0.2004320  
C 1.5052070 -1.0118190 0.1561650  
H 1.8900770 -2.0130880 0.3123080  
C 2.3144380 0.0981550 0.0221620  
C 3.7604410 0.1693980 0.0391160  
C 4.5727920 1.2743370 0.1913570  
S 4.7411520 -1.2777300 -0.1582970  
C 5.9633410 0.9682480 0.1593700  
H 4.1844930 2.2765250 0.3398050  
C 6.2120030 -0.3654460 -0.0154660  
H 6.7449230 1.7118580 0.2699120  
H 7.1656000 -0.8731190 -0.0702870  
C -2.3144380 -0.0981480 -0.0221890  
C -3.7604390 -0.1693910 -0.0391290  
C -4.5727860 -1.2743210 -0.1914510

S -4.7411500 1.2777210 0.1584240  
C -5.9633340 -0.9682420 -0.1594050  
H -4.1844810 -2.2764970 -0.3399680  
H -6.7449030 -1.7118590 -0.2699970  
C -6.2120070 0.3654280 0.0155490  
H -7.1656030 0.8730980 0.0704180

## M4

C -1.3270370 -0.8614570 0.2150970  
C 0.0000330 -0.3375490 0.1062920  
H -1.5523150 -1.9018100 0.4233680  
C 0.0000210 1.0334130 -0.1355130  
C -2.3006390 0.0937840 0.0567150  
C -3.7432370 -0.0537120 0.0913740  
C -4.7091910 0.9009820 0.3277610  
S -4.4948590 -1.6152110 -0.2035820  
C -6.0383270 0.3888280 0.2845980  
H -4.4730800 1.9369690 0.5473860  
H -6.9215430 0.9945870 0.4551280  
S 1.5959770 1.7013760 -0.2487610  
C 2.3006770 0.0938440 0.0567180  
C 1.3270970 -0.8614290 0.2150980  
H 1.5524900 -1.9017510 0.4234090  
C 3.7432980 -0.0535890 0.0914300  
C 4.7092780 0.9009320 0.3282320  
S 4.4947170 -1.6150980 -0.2040350  
C 6.0383960 0.3886080 0.2849520  
H 4.4732590 1.9368790 0.5481140  
C 6.0843780 -0.9520560 0.0179880  
H 6.9216700 0.9942160 0.4557390  
H 6.9507140 -1.5948710 -0.0619770  
S -1.5959720 1.7013390 -0.2487520  
C -6.0844490 -0.9519350 0.0180470  
H -6.9508120 -1.5947170 -0.0618160

## S1

C -5.4253140 -0.8921040 0.0838720  
C -6.7633730 -1.3497580 0.0225500  
H -4.5682070 -1.5559880 0.1276940  
C -7.7602860 -0.3771360 -0.0157250  
S -7.4632420 -2.9511530 -0.0109530  
C -9.0763330 -0.8918810 -0.0619950  
H -9.9736300 -0.2840980 -0.0821330  
C -9.1001790 -2.2728890 -0.0620290  
C -10.2466710 -3.1543290 -0.1014290  
C -10.2981910 -4.5191160 0.0982030  
S -11.8566860 -2.5337880 -0.4443840  
C -11.6088900 -5.0627140 -0.0154420  
H -9.4227630 -5.1156000 0.3328450  
C -12.5551940 -4.1164660 -0.3003140  
H -11.8366200 -6.1148660 0.1148630  
H -13.6204840 -4.2464720 -0.4357710  
C -5.2979650 0.4810700 0.0929760  
C -4.0897760 1.2640100 0.1480770  
C -3.9639000 2.6406090 0.2710980  
S -2.5056080 0.5267740 0.0458390  
C -2.6249140 3.0793460 0.2812880  
H -4.8170020 3.3064250 0.3541030  
C -1.6700690 2.0735400 0.1825060  
H -2.3420540 4.1228980 0.3677690  
B -0.1387150 2.2802510 0.1740490  
C 0.3954670 3.7703360 0.0445040  
C 0.7413120 4.5157930 1.1961600  
C 0.5290900 4.3827800 -1.2237110  
C 1.2070720 5.8290510 1.0645870  
C 1.0050270 5.6956480 -1.3188890  
C 1.3526380 6.4376750 -0.1859190  
H 1.4629940 6.3906550 1.9617390  
H 1.1040200 6.1507510 -2.3031400  
C 0.5960920 3.9136980 2.5789940  
H -0.4449610 3.6396010 2.7919520  
H 1.1924580 2.9991810 2.6853600  
H 0.9204880 4.6156790 3.3536900  
C 0.1566690 3.6348760 -2.4880490  
H 0.7014420 2.6863940 -2.5735430  
H -0.9124410 3.3897370 -2.5091740

H 0.3809230 4.2280800 -3.3802320  
C 1.8922330 7.8440810 -0.3104030  
H 1.6375810 8.4502650 0.5656910  
H 2.9873520 7.8444730 -0.3966300  
H 1.4982780 8.3473670 -1.1999470  
Se -7.0055600 1.3355090 0.0182380  
C 0.8800000 1.1254140 0.2801420  
S 2.5886050 1.4613110 -0.0053440  
C 0.7434540 -0.2211770 0.28690720  
C 3.0597430 -0.1933140 0.2913950  
C 1.9438660 -0.9582740 0.6068070  
H -0.2121470 -0.6685450 0.8478170  
C 4.4354900 -0.6190800 0.1987390  
H 1.9964470 -2.0153180 0.8462250  
S 4.8550790 -2.3333640 0.3797110  
C 5.5601840 0.1537140 -0.0255970  
C 6.5492440 -1.9783220 0.1549390  
C 6.7445190 -0.6138490 -0.0485680  
H 5.5208650 1.2285860 -0.1600910  
C 7.7043760 -2.8004130 0.1374310  
Se 8.5662610 -0.2435660 -0.2869060  
H 7.6732830 -3.8763280 0.2736670  
C 8.8795890 -2.1162230 -0.0806200  
C 10.2218540 -2.6438700 -0.1584170  
C 11.3846430 -1.9956740 -0.5242020  
S 10.5707820 -4.3225670 0.2419070  
C 12.5387980 -2.8273690 -0.4900550  
H 11.4079770 -0.9513720 -0.8191490  
H 13.5345950 -2.4853400 -0.7493420  
C 12.2596660 -4.1086550 -0.0993390  
H 12.9386380 -4.9435340 0.0107860

## S2

C -5.5740560 -0.5888570 0.1158140  
C -6.9374250 -1.0100950 0.0188570  
H -4.7548060 -1.2867320 0.2595400  
C -7.8410170 0.0374010 -0.1429080  
C -5.3686750 0.7652060 0.0346370  
C -4.1247740 1.4948830 0.1030660  
C -3.9349310 2.8596640 0.2548850  
S -2.5796980 0.6851340 -0.0208300  
C -2.5753610 3.2340310 0.2732780  
H -4.7553220 3.5625380 0.3601040  
C -1.6706720 2.1859450 0.1531290  
H -2.2431030 4.2605050 0.3846440  
B -0.1305020 2.3171120 0.1571850  
C 0.4782350 3.7806550 0.0601100  
C 0.8521920 4.4838450 1.2290870  
C 0.6529050 4.4111590 -1.1945590  
C 1.3855780 5.7741650 1.1277790  
C 1.1957440 5.6993500 -1.2592960  
C 1.5721310 6.3995480 -0.1086010  
H 1.6626880 6.3035460 2.0380610  
H 1.3254460 6.1685110 -2.2333590  
C 0.6652010 3.8627910 2.5984790  
H -0.3913200 3.6474440 2.8028010  
H 1.2051200 2.9121230 2.6872220  
H 1.0276890 4.5278160 3.3887150  
C 0.2543410 3.7079360 -2.4763560  
H 0.7703690 2.7461140 -2.5886390  
H -0.8215820 3.4953670 -2.4994750  
H 0.4938750 4.3170280 -3.3537230  
C 2.1835130 7.7786980 -0.2017110  
H 2.0139820 8.3548490 0.7141100  
H 3.2699350 7.7233170 -0.3541880  
H 1.7692780 8.3453200 -1.0428780  
Se -7.0217910 1.7066630 -0.1999530  
S -9.4817690 -0.4966490 -0.2446860  
C -8.9579160 -2.1910140 -0.0874650  
C -7.5947290 -2.2815940 0.0470060  
H -7.0725770 -3.2273670 0.1439320  
C -9.9515210 -3.2469160 -0.1037930  
C -11.2424150 -3.2162790 -0.5868550  
S -9.5924090 -4.8328990 0.5641550  
C -11.9364350 -4.4513360 -0.4349250  
H -11.6764400 -2.3394150 -1.0559990

C -11.1762760 -5.4198030 0.1608370  
H -12.9569820 -4.6117150 -0.7647550  
H -11.4440140 -6.4427610 0.3889610  
C 0.8284380 1.1106300 0.2484210  
S 2.5531880 1.3620240 -0.0270930  
C 0.6212120 -0.2312490 0.5449550  
C 2.9371010 -0.3160520 0.2545300  
C 1.7836650 -1.0287980 0.5500980  
H -0.3568410 -0.6323920 0.7858660  
C 4.2943520 -0.8077150 0.1670000  
H 1.7832110 -2.0887720 0.7823950  
S 4.5949830 -2.5605960 0.1078640  
C 5.4715910 -0.0976570 0.1162040  
C 6.2978460 -2.2805620 0.0288800  
C 6.6307980 -0.9280510 0.0355260  
H 5.5076040 0.9859860 0.1496270  
Se 7.7854090 -3.3944330 -0.0691850  
C 8.0395790 -0.6744680 -0.0464200  
C 8.8326130 -1.7880770 -0.1167550  
H 8.4528980 0.3291940 -0.0715440  
C 10.2748490 -1.8757200 -0.2057580  
C 11.0525390 -2.9289140 -0.6389940  
S 11.2983360 -0.5303120 0.2804470  
C 12.4511110 -2.6629130 -0.5935860  
H 10.6303170 -3.8616270 -0.9994570  
H 13.2089240 -3.3740380 -0.9034100  
C 12.7393050 -1.4096610 -0.1270890  
H 13.7072140 -0.9444950 0.0034600

### S3

C -5.3343900 -0.8886790 -0.0415340  
S -6.7750800 1.3023830 -0.0295390  
C -6.6903350 -1.2861000 0.0027840  
H -4.4924620 -1.5710970 -0.0624480  
C -7.6023980 -0.2317810 0.0121050  
S -7.5213980 -2.8210490 0.0434470  
C -8.9605310 -0.6293100 0.0641440  
H -9.8021360 0.0530130 0.0956130  
C -9.0968600 -2.0031870 0.0921430  
C -10.3116910 -2.7873590 0.1500970  
C -10.4627590 -4.1318100 0.4232130  
S -11.8810800 -2.0526070 -0.1520980  
C -11.8171490 -4.5693990 0.3981330  
H -9.6276050 -4.7857690 0.6512420  
C -12.6969670 -3.5625880 0.1078560  
H -12.1224700 -5.5911930 0.5945380  
H -13.7747440 -3.6101050 0.0290680  
C -5.1963990 0.4870140 -0.0656830  
C -3.9827500 1.2665130 -0.1147720  
C -3.8470590 2.6428390 -0.2267360  
S -2.4063880 0.5147920 -0.0176290  
C -2.5035890 3.0696100 -0.2315340  
H -4.6924290 3.3185240 -0.3038530  
C -1.5575430 2.0551410 -0.1404060  
H -2.2118820 4.1114690 -0.3089690  
B -0.0242450 2.2471940 -0.1318700  
C 0.5250900 3.7298440 0.0155450  
C 0.6633300 4.3264470 1.2908810  
C 0.8797950 4.4847340 -1.1271580  
C 1.1525270 5.6331250 1.4014430  
C 1.3586270 5.7917210 -0.9801500  
C 1.5089780 6.3844810 0.2772900  
H 1.2551930 6.0759780 2.3909050  
H 1.6210780 6.3608860 -1.8705960  
C 0.2812590 3.5683020 2.562160  
H -0.7913810 3.3388590 2.5655070  
H 0.8119520 2.6108660 2.6194500  
H 0.5151120 4.1470170 3.4454140  
C 0.7296130 3.9002310 -2.5170070  
H 1.3147110 2.9796290 -2.6328830  
H -0.3144160 3.6416580 -2.7348350  
H 1.0640410 4.6069100 -3.2831090  
C 2.0628140 7.7837220 0.4187830  
H 1.6581320 8.2876240 1.3032100  
S 3.1559770 7.7704370 0.5261210  
H 1.8320360 8.3968690 -0.4590010  
C 0.9822170 1.0832380 -0.2564600  
S 2.6943160 1.3946760 0.0351810  
C 0.8304340 -0.2556560 -0.5989220

C 3.1470530 -0.2586170 -0.2950870  
C 2.0227870 -1.0057040 -0.6226800  
H -0.1300490 -0.6873360 -0.8571430  
C 4.5189060 -0.7008360 -0.2147570  
H 2.0640360 -2.0759630 -0.8843880  
S 4.9080290 -2.4283930 -0.3642570  
C 5.6563280 0.0616750 -0.0243030  
C 6.6084830 -2.0948310 -0.1712160  
C 6.8281960 -0.7288870 0.0011350  
H 5.6368790 1.1400710 0.0834080  
C 7.7837580 -2.8849510 -0.1648160  
S 8.5314410 -0.3977050 0.1949050  
H 7.8060750 -3.9595260 -0.3046540  
C 8.9193950 -2.1213230 0.0184780  
C 10.2976500 -2.5583740 -0.0830330  
C 11.4509240 -1.8086070 -0.0280210  
S 10.6998570 -4.2511990 0.3402720  
C 12.6433130 -2.5786250 0.0830250  
H 11.4444240 -0.7377870 -0.2024810  
H 13.6398790 -2.1567720 0.0137490  
C 12.4010300 -3.9112030 0.2771010  
H 13.1136020 -4.7174730 0.3880240

### S4

C -5.4934110 -0.5396920 0.1343040  
C -6.8741990 -0.8827750 0.0150020  
H -4.7024040 -1.2631170 0.2993900  
C -7.6751990 0.2428110 -0.1689660  
C -5.2602530 0.8126300 0.0401140  
C -4.0037900 1.5252380 0.1159140  
C -3.7900990 2.8859060 0.2701020  
S -2.4763600 0.6853600 -0.0062810  
C -2.4227510 3.2332690 0.2903550  
H -4.5955640 3.6051870 0.3751480  
C -1.5388680 2.1676600 0.1722890  
H -2.0706000 4.2530100 0.4029330  
B 0.0037500 2.2629910 0.1765140  
C 0.6498720 3.7074300 0.0490090  
C 1.0613330 4.4157250 1.2023460  
C 0.8204180 4.3166910 -1.2167010  
C 1.6254070 5.6905430 0.1573260  
C 1.3953930 5.5893350 -1.3071820  
C 1.8077560 6.2947740 -0.1721750  
H 1.9298820 6.2246550 1.9740020  
H 1.5217260 6.0421670 -2.2893730  
C 0.8806390 3.8179830 2.5829420  
H -0.1773370 3.6300780 2.8060880  
H 1.3998960 2.8564360 2.6771070  
H 1.2700640 4.4853170 3.3582590  
C 0.3843770 3.6076290 -2.4830230  
H 0.8712700 2.6300150 -2.5891810  
H -0.6973310 3.4257380 -2.4888290  
H 0.6291670 4.1977750 -3.3718040  
C 2.4515060 7.6569480 -0.2931550  
H 2.3033350 8.2519690 0.6142670  
H 3.5350200 7.5728520 -0.4530690  
H 2.0440020 8.2193850 -1.1403570  
S -9.3590470 -0.1409490 -0.3082050  
C -8.9875970 -1.8761160 -0.1374660  
C -7.6422530 -2.0902930 0.0297330  
H -7.2123140 -3.0800510 0.1382130  
C -10.0720050 -2.8387560 -0.1729910  
C -11.3294730 -2.7110430 -0.7233570  
S -9.8904170 -4.4243890 0.5629490  
C -12.1386720 -3.8736110 -0.5683700  
H -11.6582820 -1.8172480 -1.2432730  
C -11.4986410 -4.8835030 0.0961310  
H -13.1520630 -3.9551040 -0.9457330  
H -11.8682890 -5.8699960 0.3418360  
S -6.7725080 1.7205010 -0.2119870  
C 0.9284100 1.0320440 0.2958070  
S 2.6534480 1.2148430 -0.0250220  
C 0.6841780 -0.2879700 0.6547990  
C 2.9889330 -0.4624000 0.3188430  
C 1.8204270 -1.1226610 0.6708760  
H -0.3009220 -0.6442430 0.9344200  
C 4.3271970 -1.0028090 0.2188800  
H 1.7903740 -2.1710270 0.9492820  
S 4.5633010 -2.7690500 0.2350190

C 5.5241570 -0.3354790 0.0999990  
C 6.2749960 -2.5492530 0.0928450  
C 6.6512860 -1.2090380 0.0253470  
H 5.5950800 0.7466310 0.0799930  
S 7.6222520 -3.6355960 0.0123840  
C 8.0680070 -1.0570960 -0.11101030  
C 8.7387060 -2.2541830 -0.1417490  
H 8.5679930 -0.0991090 -0.2023430  
C 10.1617850 -2.5061940 -0.2650830  
C 10.8076810 -3.6492820 -0.6855080  
S 11.3352780 -1.2676380 0.1574290  
C 12.2279260 -3.5346730 -0.6803420  
H 10.2798360 -4.5401440 -1.0096430  
H 12.8963210 -4.3315960 -0.9872170  
C 12.6618280 -2.3077480 -0.2591870  
H 13.6772040 -1.9462720 -0.1668700

### S1-F

C -5.3890610 -0.7685460 0.6219130  
C -6.6809210 -1.3345910 0.4616090  
H -4.6488820 -1.1530970 1.3155580  
C -7.5212190 -0.7415950 -0.4749690  
S -7.4749300 -2.6936390 1.2237010  
C -8.7930920 -1.3496050 -0.5888170  
H -9.5783870 -1.0111240 -1.2555320  
C -8.9435080 -2.4242660 0.2648570  
C -10.0907720 -3.2887660 0.4371380  
C -10.3520340 -4.1993230 1.4406980  
S -11.4084490 -3.2872230 -0.7305690  
C -11.5929450 -4.8817030 1.2845260  
H -9.6802200 -4.3639170 2.2766110  
C -12.2790910 -4.4945720 0.1667540  
H -11.9606340 -5.6258650 1.9827010  
H -13.2406380 -4.8388920 -0.1894810  
C -5.1397930 0.3164070 -0.1902860  
C -3.9439620 1.1149080 -0.2865750  
C -3.6657520 2.1471790 -1.1613910  
S -2.5705740 0.8822140 0.7910650  
C -2.3831040 2.7272870 -0.9660250  
H -4.3668940 2.4809310 -1.9221670  
C -1.6298800 2.1663330 0.0439610  
H -2.0194840 3.5627820 -1.5557370  
C 0.2565650 4.0751450 0.3194660  
C 0.0121080 5.0882000 1.2906980  
C 0.7880540 4.5123550 -0.9248030  
C 0.3417930 6.4269730 1.0346190  
C 1.0999140 5.8630170 -1.1470990  
C 0.9031460 6.8415070 -0.1741800  
H 0.1408870 7.1719130 1.8047480  
H 1.5043130 6.1557870 -2.1159890  
C -0.6362580 4.8106010 2.6377450  
H -1.5499330 4.2179310 2.5370420  
H 0.0217870 4.2445050 3.3030150  
H -0.8932040 5.7546360 3.1325100  
C 1.0418550 3.5728860 -2.0922320  
H 1.9400470 2.9628260 -1.9424540  
H 0.2156510 2.8758720 -2.2534340  
H 1.1841090 4.1463860 -3.0157770  
C 1.2824190 8.2852190 -0.4139360  
H 0.5774230 8.9727220 0.0680770  
H 2.2784310 8.5140370 -0.0094810  
H 1.3070860 8.5210490 -1.4837860  
Se -6.6585530 0.7135260 -1.2878010  
C 0.9529380 1.4039510 0.0477720  
S 2.6032120 1.4463550 0.6498310  
C 0.8227870 0.3148640 -0.7857390  
C 3.0868660 0.0168820 -0.2573100  
C 2.0027100 -0.4588680 -0.9674080  
H -0.1151220 0.0791020 -1.2791570  
C 4.4325470 -0.5017470 -0.1966340  
H 2.0526580 -1.3351240 -1.6080390  
S 4.8201850 -2.0719410 -0.9340110  
C 5.5507410 0.0639860 0.3864760  
C 6.4965150 -1.9319740 -0.4499540  
C 6.7037540 -0.7434180 0.2424030  
H 5.5294450 1.0260060 0.8851180  
C 7.6250030 -2.7695370 -0.6414350  
Se 8.5005800 -0.5981710 0.7591220  
H 7.5845900 -3.7111990 -1.1796720

C 8.7923530 -2.2813510 -0.0986620  
C 10.1091000 -2.8747910 -0.1137680  
C 11.3201890 -2.3037040 0.2218870  
S 10.3524940 -4.5505190 -0.6006880  
C 12.4288280 -3.1871780 0.0858300  
H 11.4121470 -1.2713580 0.5442020  
H 13.4531780 -2.9030550 0.3011840  
C 12.0691530 -4.4315490 -0.3532320  
H 12.7002580 -5.2880870 -0.5485600  
B -0.1322680 2.4963440 0.6221220  
F -0.1594270 2.2359750 2.0511480

**S2-F**

C -5.5755890 -0.5476680 0.4711980  
C -6.8692350 -1.1229400 0.2397530  
H -4.9422890 -0.8484580 1.3001230  
C -7.5316210 -0.6039270 -0.8667490  
C -5.1869640 0.4182380 -0.4199510  
C -3.9619750 1.1821880 -0.4643220  
C -3.6223210 2.2267260 -1.2997480  
S -2.6352840 0.8753850 0.6509830  
C -2.3291660 2.7629500 -1.0429520  
H -4.2894560 2.6116000 -2.0672520  
C -1.6325230 2.1534600 -0.0220760  
H -1.9221630 3.6040810 -1.5955710  
C 0.2483970 4.0064510 0.5360780  
C -0.0621280 4.8890990 1.6105890  
C 0.8509590 4.5970390 -0.6083130  
C 0.2772980 6.2481240 1.5484470  
C 1.1707090 5.9638600 -0.6363920  
C 0.9121300 6.8106710 0.4401070  
H 0.0255770 6.8902820 2.3924770  
H 1.6318530 6.3766170 -1.5336130  
C -0.7979670 4.4445590 2.8644770  
H -1.7061880 3.8833390 2.6248620  
H -0.1892820 3.7855890 3.4891470  
H -1.0846470 5.3178180 3.4621620  
C 1.1753800 3.8169840 -1.8719380  
H 2.0698530 3.1946370 -1.7539500  
H 0.3660370 3.1452060 -2.1681670  
H 1.3625970 4.5065010 -2.7036250  
C 1.3019500 8.2710490 0.4103430  
H 0.5880670 8.8899590 0.9663440  
H 2.2893140 8.8354300 0.8644360  
H 1.3529870 8.4622900 -0.6158880  
Se -6.5429880 0.7040060 -1.7542110  
S -9.0914710 -1.3113540 -1.1167920  
C -8.8590540 -2.3641350 0.2977920  
C -7.6432920 -2.1324870 0.8950870  
H -7.3027230 -2.6802310 1.7676010  
C -9.9014260 -3.2995110 0.6724360  
C -10.9501630 -3.7814600 -0.0818900  
S -9.9584270 -3.9842910 2.2915510  
C -11.7861030 -4.6965660 0.6217390  
H -11.1069260 -3.5027800 -1.1187460  
C -11.3756650 -4.9135160 1.9080460  
H -12.6520140 -5.1792350 0.1817400  
H -11.8129270 -5.5603620 2.6567160  
C 0.9421120 1.3806140 -0.0567650  
S 2.5663450 1.2993930 0.6112420  
C 0.8320270 0.4299050 -1.0457030  
C 3.0641860 0.0032210 -0.4707100  
C 2.0072110 -0.3369730 -1.2885740  
H -0.0878720 0.2881630 -1.6048810  
C 4.3983780 -0.5544570 -0.4257600  
H 2.0664640 -1.1198300 -2.0400730  
S 4.8581480 -1.8321560 -1.5848890  
C 5.4468970 -0.2498810 0.4090880  
C 6.4457240 -1.9123750 -0.8987550  
C 6.6275390 -1.0189390 0.1504750  
H 5.3770590 0.5018690 1.1878290  
Se 7.9645190 -2.9281030 -1.2638580  
C 7.9418270 -1.0552030 0.7211410  
C 8.8073200 -1.9538090 0.1547600  
H 8.2441750 -0.4027650 1.5350780  
C 10.1868180 -2.2287810 0.4961400  
C 11.1632780 -2.8365850 -0.2647420  
S 10.8395510 -1.7862370 2.0695390

C 12.4217790 -2.9401980 0.3950260  
H 10.9864490 -3.1806760 -1.2788690  
H 13.3027540 -3.3826810 -0.0571080  
C 12.4072570 -2.4118430 1.6564990  
H 13.2168750 -2.3473580 2.3710740  
B -0.1485030 2.4028400 0.6238950  
F -0.2109830 1.9657940 2.0092900

**S3-F**

C -5.2559350 -0.8238170 0.5634320  
S -6.4772680 0.7353350 -1.1528770  
C -6.5686370 -1.3329860 0.3995800  
H -4.4997470 -1.2590240 1.2062220  
C -7.3628740 -0.6202480 -0.4940090  
S -7.4515880 -2.6880420 1.0594220  
C -8.6744660 -1.1307130 -0.6544630  
H -9.4325540 -0.6923220 -1.2937990  
C -8.8962310 -2.2513110 0.1207440  
C -10.0976230 -3.0503130 0.2330210  
C -10.4351710 -3.9831830 1.1922280  
S -11.3857750 -2.9212830 -0.9598160  
C -11.7109440 -4.5818410 0.9828900  
H -9.7939200 -4.2205740 2.0346020  
C -12.3477510 -4.1080410 -0.1307780  
H -12.1384400 -5.3295880 1.6420720  
H -13.3205500 -4.3775430 -0.5194360  
C -5.0306040 0.2983730 -0.2107160  
C -6.8301810 1.0933360 -0.3222350  
C -3.5473920 2.1149230 -1.2074400  
S -2.4602870 0.8627930 0.7582440  
C -2.2602360 2.6885420 -1.0162830  
H -4.2425730 2.4444490 -1.9747820  
C -1.5105940 2.1324510 -0.0013320  
H -1.8907320 3.5154600 -1.6144910  
C 0.3891850 4.0298860 0.2611140  
C 0.1480020 5.0518100 1.2238240  
C 0.9273420 4.4541720 -0.9847360  
C 0.4865680 6.3865840 0.9583560  
C 1.2481610 5.8010910 -1.2164930  
C 1.0541310 6.7883270 -0.2518330  
H 0.2878210 7.1386990 1.2204040  
H 1.6574110 6.0838680 -2.1863230  
C -0.5060090 4.7885230 2.5710270  
H -1.4227610 4.2002710 2.4723000  
H 0.1467590 4.2233980 3.2427760  
H -0.7590410 5.7378820 3.0575560  
C 1.1785490 3.5040110 -2.1439640  
H 2.0698690 2.8862900 -1.9849170  
H 0.3464020 2.8138800 -2.3204570  
H 1.3312180 4.0694190 -3.0708220  
C 1.4429740 8.2277690 -0.5017440  
H 0.7435960 8.9232610 -0.0230460  
H 2.4413180 8.4523290 -0.1006460  
H 1.4673690 8.4563790 -1.5731780  
C 1.0652250 1.3501650 0.0103090  
S 2.7112040 1.3730320 0.6253070  
C 0.9274770 0.2604230 -0.8210240  
C 3.1832680 -0.0650240 -0.2743120  
C 2.0987600 -0.5287510 -0.9917440  
H -0.0096700 0.0352480 -1.3207980  
C 4.5208450 -0.6035720 -0.2007530  
H 2.1424220 -1.4071170 -1.6299530  
S 4.8780430 -2.1977160 -0.9094450  
C 5.6467710 -0.0460710 0.3745240  
C 6.5537010 -2.0802320 -0.4250160  
C 6.7836800 -0.8284880 0.2466520  
H 5.6444240 0.9257670 0.8541230  
C 7.6972660 -2.9029790 -0.5726370  
S 8.4573300 -0.7634150 0.7322160  
H 7.7071160 -3.8588610 -1.05843060  
C 8.8219760 -2.3395230 -0.0040420  
C 10.1678390 -2.8683350 0.0538870  
C 11.3464860 -2.2161890 0.3535910  
S 10.4876200 -4.5680970 -0.2737100  
C 12.4930370 -3.0609470 0.3127520  
H 11.3921300 -1.1560200 0.5796520  
H 13.5010020 -2.7148090 0.5143020  
C 12.1933930 -4.3536640 -0.0180520

H 12.8632220 -5.1957130 -0.1289050  
B -0.0111010 2.4562930 0.5748890  
F -0.0405540 2.2069420 2.0060540

**S4-F**

C -4.8014610 -0.4159740 0.3402320  
C -6.0172810 -1.0869960 -0.0099900  
H -3.9877180 -0.8831440 0.8839460  
C -6.8993390 -0.2513000 -0.6873600  
C -4.7647450 0.8965130 -0.0655220  
C -3.7181700 1.8823890 0.0980320  
C -3.7669960 3.2466940 -0.1056790  
S -2.1002210 1.4313170 0.6208360  
C -2.5293760 3.8998290 0.1499250  
H -4.6678870 3.7673210 -0.4199870  
C -1.4997460 3.0774470 0.5549400  
H -2.3942340 4.9715470 0.0342780  
C 0.7365260 4.5897390 0.0677490  
C 1.4524740 5.7109420 0.5803090  
C 0.7302540 4.4413830 -1.3462470  
C 2.0660010 6.6296500 -0.2827610  
C 1.3625580 5.3792720 -2.1786880  
C 2.0313670 6.4911400 -1.6717690  
H 2.5975810 7.4784570 0.1477940  
H 1.3308470 5.2284860 -3.2577820  
C 1.6218780 5.9828500 2.0668760  
H 0.6738650 6.2285470 2.5522810  
H 2.0180090 5.1122100 2.5982960  
H 2.3149370 6.8185160 2.2193600  
C 0.0510260 3.2830370 -2.0604980  
H 0.1587150 2.3363850 -1.5269170  
H -1.0248760 3.4536000 -2.1818240  
H 0.4803210 3.1520080 -3.0609560  
C 2.7261540 7.4812320 -2.5792180  
H 2.5975560 8.5112330 -2.2255910  
H 3.8079980 7.2946040 -2.6295240  
H 2.3397960 7.4253120 -3.6029510  
S -8.3875160 -1.0353300 -1.1123890  
C -7.8088020 -2.5518290 -0.3802500  
C -6.5529030 -2.4031620 0.1568290  
H -6.0202040 -3.2167100 0.6378360  
C -8.6616710 -3.7245410 -0.4063890  
C -9.7154420 -4.0156720 -1.2463800  
S -8.4318840 -5.0303720 0.7489300  
C -10.3278930 -5.2743430 -0.9778240  
H -10.0291690 -3.3556880 -2.0484090  
C -9.7418880 -5.9420620 0.0619340  
H -11.1642930 -5.6683770 -1.5448700  
H -9.9933580 -6.9121650 0.4691130  
S -6.2669300 1.3475870 -0.9238250  
C 0.9555230 2.1897800 1.3652680  
S 2.2521400 1.6372270 0.3214950  
C 0.9275970 1.3836530 2.4849280  
C 2.7180700 0.3317680 1.4036140  
C 1.8998440 0.3461230 2.5146340  
H 0.2173650 1.5518670 3.2884840  
C 3.8137700 -0.5596470 1.0878370  
H 2.0041160 -0.3567770 3.3368990  
S 4.0429140 -2.0423810 2.0595720  
C 4.7679350 -0.4593060 0.1039910  
C 5.4339540 -2.4647820 1.1122270  
C 5.7029110 -1.5440810 0.1048070  
H 4.8074670 0.3730960 -0.5899980  
S 6.5620670 -3.7821990 1.1479040  
C 6.8441250 -1.9218690 -0.6709380  
C 7.4211580 -3.0969590 -0.2536690  
H 7.2133190 -1.3552530 -1.5192620  
C 8.5804860 -3.7882320 -0.7841600  
C 8.9472850 -5.1095420 -0.6406350  
S 9.7718010 -2.9332370 -1.7553680  
C 10.1628630 -5.4396900 -1.3076270  
H 8.3517840 -5.8298540 -0.0894780  
H 10.5966150 -6.4337770 -1.3082940  
C 10.7200870 -4.3746230 -1.9597730  
H 11.6263850 -4.3427520 -2.5494780  
B 0.0031220 3.5028060 1.0769420  
F -0.2396960 4.0825010 2.3839220
